# Supplementary material for: The Effects of a Partially Hydrolyzed Formula with Low Lactose and Probiotics on Mild Gastrointestinal Disorders of Infants: A Single-Armed Clinical Trial
Source: MDPI journal article supplement (doi:10.3390/nu13103371), 2021-09-25
Supplement: s1 [file s1]

## Supplementary data

**Table S1.** Composition of study formula

| Nutrition                  | Composition      |
|----------------------------|------------------|
| Energy (kcal/100mL)        | 280              |
| Protein (g/100mL)          | 1.27             |
| Lipids (g/100mL)           | 3.4              |
| Carbohydrates (g/100mL)    | 7.83             |
| <b>Lactose (g/100mL)</b>   | <3.1             |
| Vitamins                   |                  |
| A (µg RE/100mL)            | 66.66            |
| D (µg/100mL)               | 0.89             |
| E (mg α-TE/100mL)          | 1.31             |
| K <sub>1</sub> (µg/100mL)  | 5.75             |
| B <sub>1</sub> (µg/100mL)  | 65.35            |
| B <sub>2</sub> (µg/100mL)  | 117.63           |
| B <sub>6</sub> (µg/100mL)  | 47.05            |
| B <sub>12</sub> (µg/100mL) | 0.144            |
| C (mg/100mL)               | 9.02             |
| Minerals                   |                  |
| Sodium (mg/100mL)          | 26.14            |
| Magnesium                  | 6.54             |
| Potassium                  | 73.85            |
| Calcium (mg/100mL)         | 45.22            |
| Iron (mg/100mL)            | 0.68             |
| Zinc (mg/100mL)            | 0.65             |
| <b>Bifidobacterium</b>     | <b>Bb-12</b>     |
| <b>(CFU/g)</b>             | >10 <sup>6</sup> |

**Table S2.** Demographic characteristics and IGSQ scores at baseline for the included and excluded participants

|                             | Included<br>(n=80) | Excluded<br>(n=12) | <i>P</i> value |
|-----------------------------|--------------------|--------------------|----------------|
| Sex                         |                    |                    |                |
| Boy                         | 39 (48.8)          | 5 (41.7%)          | 0.882          |
| Girl                        | 41 (51.3)          | 7 (58.3%)          |                |
| Age (month)                 | 2.0 ± 1.5          | 1.8 ± 1.6          | 0.746          |
| Delivery mode               |                    |                    |                |
| Vaginal delivery            | 50 (62.5)          | 8 (66.7%)          | 1.000          |
| Cesarean delivery           | 30 (37.5)          | 4 (33.3%)          |                |
| Birth weight (g)            | 3266 ± 470         | 3400 (±380)        | 0.350          |
| Feeding Practice            |                    |                    |                |
| Mixed feeding               | 78 (97.5)          | 12 (100.0%)        | 1.000          |
| Exclusive formula feeding   | 2 (2.5)            | 0 (0.0%)           |                |
| IGSQ scores at baseline     | 36.0 ± 5.7         | 36.2 ± 7.4         | 0.222          |
| Maternal age (year)         | 32.1 ± 5.3         | 30.0 (4.5)         | 0.200          |
| Paternal age (year)         | 32.5 ± 5.8         | 32.5 (5.8)         | 0.193          |
| Maternal education*         |                    |                    |                |
| College or above            | 46 (58.2)          | 6 (50.0)           | 0.396          |
| Senior high school          | 25 (31.6)          | 3 (25.0)           |                |
| Junior high school or below | 8 (10.1)           | 3 (25.0)           |                |
| Paternal education*         |                    |                    |                |
| College or above            | 48 (60.8)          | 7 (58.3)           | 0.776          |
| Senior high school          | 23 (29.1)          | 3 (25.0)           |                |
| Junior high school or below | 8 (10.1)           | 2 (16.7)           |                |

**note:** \*Education of one participant's parents was unknown.

**Table S3.** Sleeping measures in the first three days of feeding intervention

| Domain                         | Day 1                            | Day 2                             |                            | Day 3                             |                            |
|--------------------------------|----------------------------------|-----------------------------------|----------------------------|-----------------------------------|----------------------------|
|                                | Mean $\pm$ SD/<br>Median (Range) | Mean $\pm$ SD /<br>Median (Range) | MD (95%CI)/<br>RR (95% CI) | Mean $\pm$ SD /<br>Median (Range) | MD (95%CI)/<br>RR (95% CI) |
| Sleeping hours                 | 15.0 $\pm$ 3.9                   | 15.1 $\pm$ 3.3                    | 0.04 (-0.5,<br>0.6)        | 15.1 $\pm$ 3.2                    | 0.1 (-0.4, 0.7)            |
| Times of wake-<br>ups at night | 4 (0, 6)                         | 3 (0, 8)                          | 1.0 (0.8, 1.2)             | 3 (2, 4)                          | 0.9 (0.8, 1.1)             |

**Table S4.** Infants' growth measures at Day 0 and Day 14 of feeding intervention

|                               | Day 0            | Day 14           | <i>P</i> value |
|-------------------------------|------------------|------------------|----------------|
|                               | Mean $\pm$ SD    | Mean $\pm$ SD    |                |
| Height (cm)                   | 58.6 $\pm$ 4.5   | 60.2 $\pm$ 4.4   | <0.001         |
| Z-score of height             | 0.22 $\pm$ 0.97  | 0.31 $\pm$ 1.00  | 0.079          |
| Weight (g)                    | 5374 $\pm$ 1405  | 5925 $\pm$ 1356  | <0.001         |
| Z-score of weight             | -0.11 $\pm$ 1.00 | 0.13 $\pm$ 1.02  | <0.001         |
| Head circumference (cm)       | 38.5 $\pm$ 2.1   | 39.2 $\pm$ 2.0   | <0.001         |
| Z-score of head circumference | -0.31 $\pm$ 1.01 | -0.28 $\pm$ 0.90 | 0.505          |
| BMI (kg/m <sup>2</sup> )      | 15.3 $\pm$ 2.0   | 16.1 $\pm$ 1.8   | <0.001         |
| Z-score of BMI                | -0.37 $\pm$ 1.06 | -0.09 $\pm$ 1.04 | <0.001         |

Notes: Z-score of each parameter was calculated according to the WHO child growth standards

(<https://www.who.int/childgrowth/standards/en/>).
